# Supplementary material
Source: ML conference proceedings conference paper supplement (https://openaccess.thecvf.com/content/cvpr_2017/html/Mueller_Context-Aware_Correlation_Filter_2017_CVPR_paper.html)
Supplement: Supplementary file 1 [file Mueller_Context-Aware_Correlation_Filter_2017_CVPR_supplemental.zip.zip]

Archive with 2 entries (2 files):
- 0526-supp.mp4
- 0526-supp.pdf
